# Supplementary material
Source: PubMed Central journal article supplement (PMC7662757)
Supplement: sc0c05706_si_001.pdf [file sc0c05706_si_001.pdf]

## Supporting Information

### Chemical recycling of aliphatic polyamides by microwave assisted hydrolysis for efficient monomer recovery

*Urška Češarek,<sup>†</sup> David Pahovnik,<sup>†,\*</sup> and Ema Žagar<sup>†,\*</sup>*

<sup>†</sup>Department of Polymer Chemistry and Technology, National Institute of Chemistry,  
Hajdrihova 19, 1000 Ljubljana, Slovenia

\*Corresponding authors: David Pahovnik – Email: [david.pahovnik@ki.si](mailto:david.pahovnik@ki.si), Ema Žagar –  
Email: [ema.zagar@ki.si](mailto:ema.zagar@ki.si)

**Number of pages: 20**

**Number of figures: 36**

#### Contents

|                                                                                                                                                                                                                                   |   |
|-----------------------------------------------------------------------------------------------------------------------------------------------------------------------------------------------------------------------------------|---|
| <b>Figure S1.</b> (Left) Microwave reactor Monowave 400 used for depolymerization studies and (right) typical temperature profile of PA depolymerization experiment together with microwave power input and system pressure. .... | 3 |
| <b>Figure S2.</b> <sup>1</sup> H NMR spectrum of AA recovered from PA 66. ....                                                                                                                                                    | 3 |
| <b>Figure S3.</b> <sup>13</sup> C NMR spectrum of AA recovered from PA 66. ....                                                                                                                                                   | 4 |
| <b>Figure S4.</b> FTIR spectra of commercial AA and that recovered from PA 66. ....                                                                                                                                               | 4 |
| <b>Figure S5.</b> <sup>1</sup> H NMR spectrum of HMDA recovered from PA 66. ....                                                                                                                                                  | 5 |
| <b>Figure S6.</b> <sup>13</sup> C NMR spectrum of HMDA recovered from PA 66. ....                                                                                                                                                 | 5 |
| <b>Figure S7.</b> FTIR spectra of commercial HMDA and that recovered from PA 66. ....                                                                                                                                             | 6 |
| <b>Figure S8.</b> <sup>1</sup> H NMR spectrum of SA recovered from PA 1010. ....                                                                                                                                                  | 6 |
| <b>Figure S9.</b> <sup>13</sup> C NMR spectrum of SA recovered from PA 1010. ....                                                                                                                                                 | 7 |
| <b>Figure S10.</b> FTIR spectra of commercial SA and that recovered from PA 1010. ....                                                                                                                                            | 7 |
| <b>Figure S11.</b> <sup>1</sup> H NMR spectrum of 1,10-DDA recovered from PA 1010. ....                                                                                                                                           | 8 |
| <b>Figure S12.</b> <sup>13</sup> C NMR spectrum of 1,10-DDA recovered from PA 1010. ....                                                                                                                                          | 8 |

|                                                                                                                                       |    |
|---------------------------------------------------------------------------------------------------------------------------------------|----|
| <b>Figure S13.</b> FTIR spectra of commercial 1,10-DDA and that recovered from PA 1010. ....                                          | 9  |
| <b>Figure S14.</b> <sup>1</sup> H NMR spectrum of 11-AUDAxHCl recovered from PA 11. ....                                              | 9  |
| <b>Figure S15.</b> <sup>13</sup> C NMR spectrum of 11-AUDAxHCl recovered from PA 11. ....                                             | 10 |
| <b>Figure S16.</b> FTIR spectra of 11-AUDAxHCl prepared from commercial 11-AUDA and that recovered from PA 11. ....                   | 10 |
| <b>Figure S17.</b> <sup>1</sup> H NMR spectrum of 12-ADDAxHCl recovered from PA 12. ....                                              | 11 |
| <b>Figure S18.</b> <sup>13</sup> C NMR spectrum of 12-ADDAxHCl recovered from PA 12. ....                                             | 11 |
| <b>Figure S19.</b> FTIR spectra of 12-ADDAxHCl prepared from commercial 12-ADDA and that recovered from PA 12. ....                   | 12 |
| <b>Figure S20.</b> <sup>1</sup> H NMR spectrum of AA recovered from PA 66-GF <sub>35</sub> . ....                                     | 12 |
| <b>Figure S21.</b> <sup>13</sup> C NMR spectrum of AA recovered from PA 66-GF <sub>35</sub> . ....                                    | 13 |
| <b>Figure S22.</b> FTIR spectra of commercial AA and that recovered from PA 66-GF <sub>35</sub> . ....                                | 13 |
| <b>Figure S23.</b> <sup>1</sup> H NMR spectrum of HMDA recovered from PA 66-GF <sub>35</sub> . ....                                   | 14 |
| <b>Figure S24.</b> <sup>13</sup> C NMR spectrum of HMDA recovered from PA 66-GF <sub>35</sub> . ....                                  | 14 |
| <b>Figure S25.</b> FTIR spectra of commercial HMDA and that recovered from PA 66-GF <sub>35</sub> . ....                              | 15 |
| <b>Figure S26.</b> <sup>1</sup> H NMR spectrum of 11-AUDAxHCl recovered from PA 11-GF <sub>30</sub> . ....                            | 15 |
| <b>Figure S27.</b> <sup>13</sup> C NMR spectrum of 11-AUDAxHCl recovered from PA 11-GF <sub>30</sub> . ....                           | 16 |
| <b>Figure S28.</b> FTIR spectra of 11-AUDAxHCl prepared from commercial 11-AUDA and that recovered from PA 11-GF <sub>30</sub> . .... | 16 |
| <b>Figure S29.</b> <sup>1</sup> H NMR spectrum of 11-AUDAxHCl recovered from PA 11-CF <sub>30</sub> . ....                            | 17 |
| <b>Figure S30.</b> <sup>13</sup> C NMR spectrum of 11-AUDAxHCl recovered from PA 11-CF <sub>30</sub> . ....                           | 17 |
| <b>Figure S31.</b> FTIR spectra of 11-AUDAxHCl prepared from commercial 11-AUDA and that recovered from PA 11-CF <sub>30</sub> . .... | 18 |
| <b>Figure S32.</b> <sup>1</sup> H NMR spectrum of 12-ADDAxHCl recovered from PA 12-GF <sub>50</sub> . ....                            | 18 |
| <b>Figure S33.</b> <sup>13</sup> C NMR spectrum of 12-ADDAxHCl recovered from PA 12-GF <sub>50</sub> . ....                           | 19 |
| <b>Figure S34.</b> FTIR spectra of 12-ADDAxHCl prepared from commercial 12-ADDA and that recovered from PA 12-GF <sub>50</sub> . .... | 19 |
| <b>Figure S35.</b> FTIR spectrum of GF recovered from PA 11-GF <sub>30</sub> . ....                                                   | 20 |
| <b>Figure S36.</b> FTIR spectrum of CF recovered from PA 11-CF <sub>30</sub> . ....                                                   | 20 |

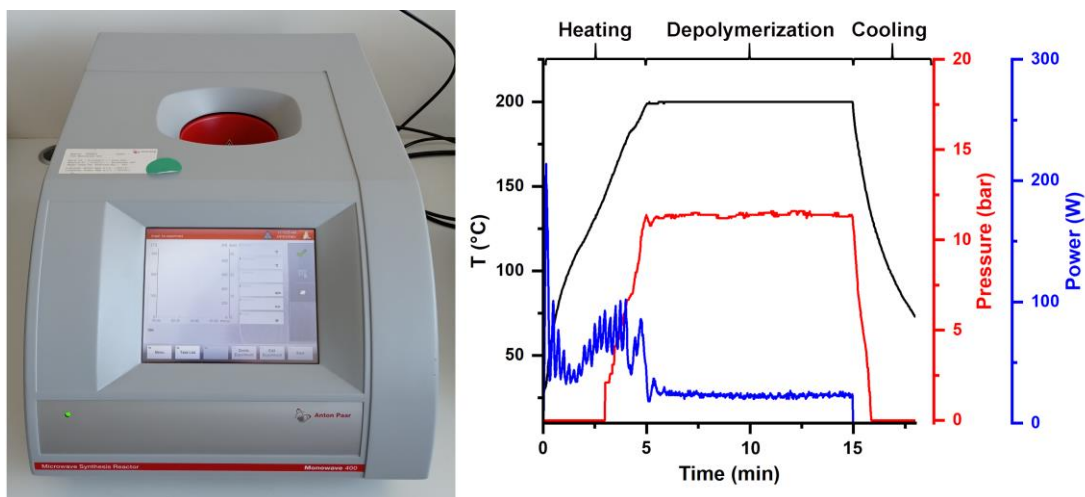

**Figure S1.** (Left) Microwave reactor Monowave 400 used for depolymerization studies and (right) typical temperature profile of PA depolymerization experiment together with microwave power input and system pressure.

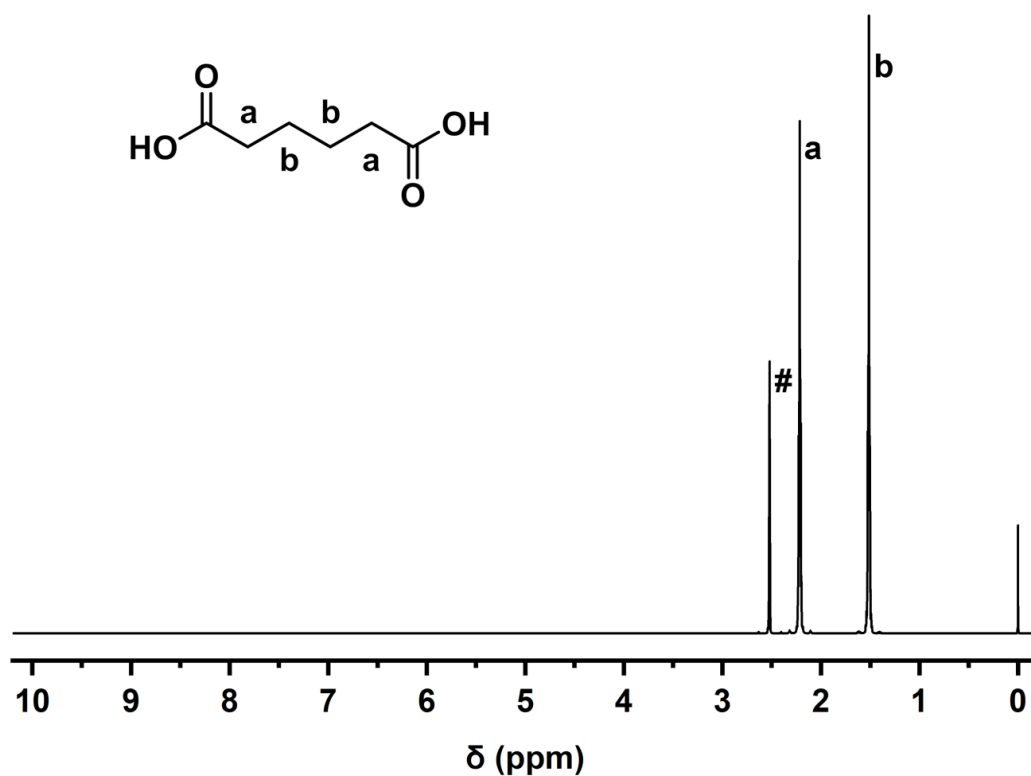

**Figure S2.** <sup>1</sup>H NMR spectrum of AA recovered from PA 66.

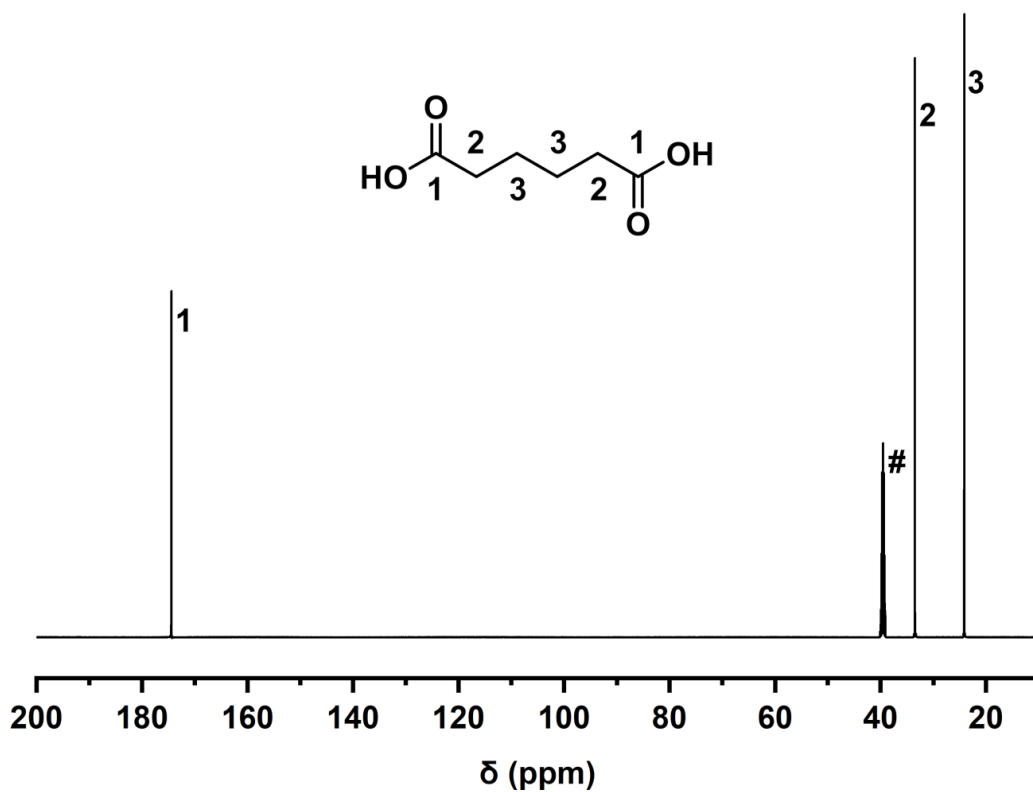

**Figure S3.**  $^{13}\text{C}$  NMR spectrum of AA recovered from PA 66.

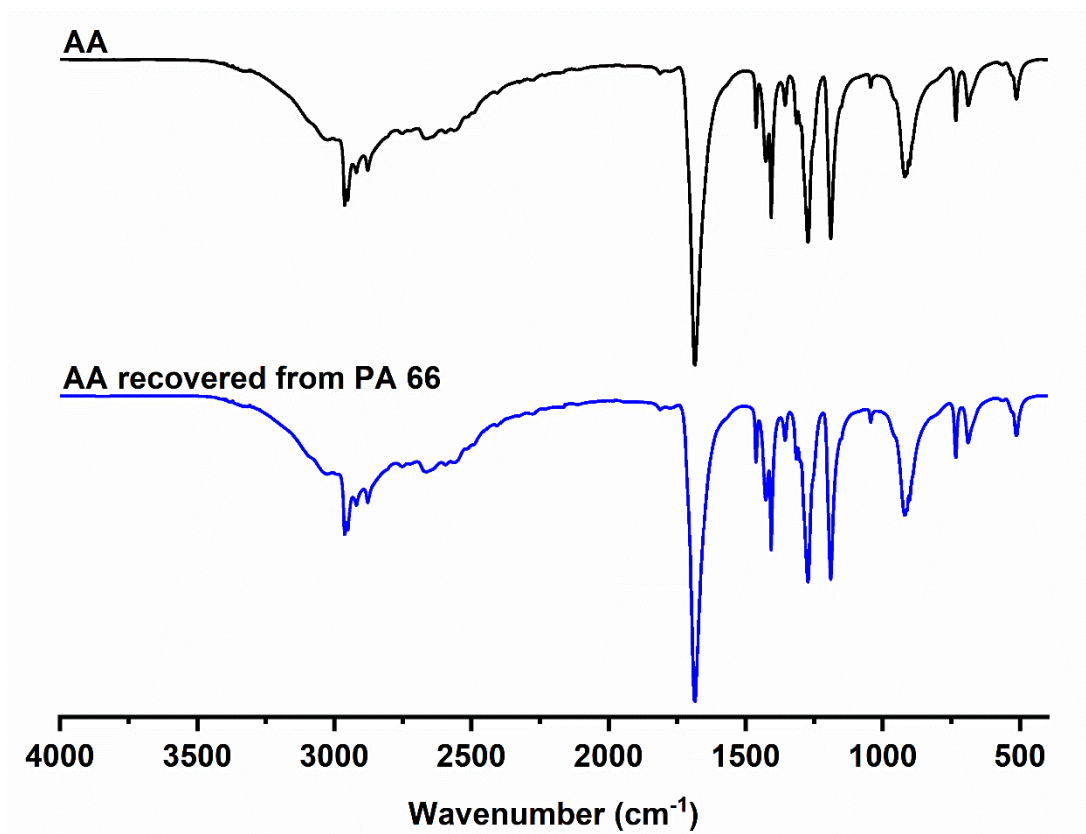

**Figure S4.** FTIR spectra of commercial AA and that recovered from PA 66.

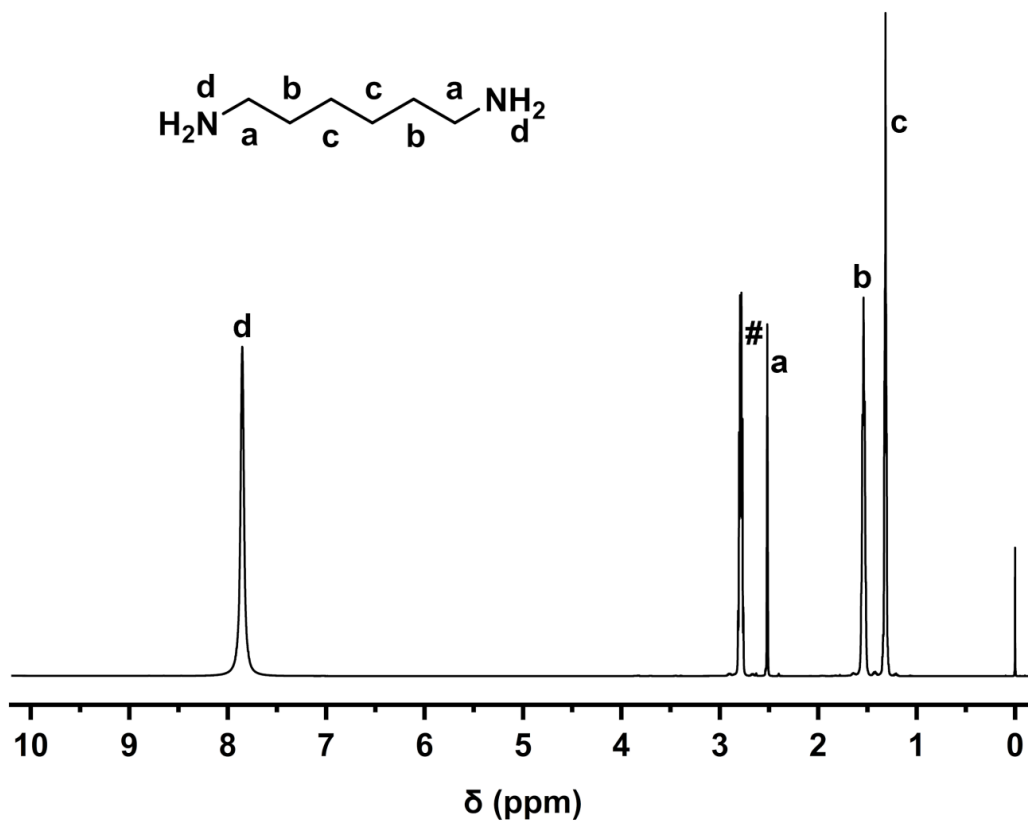

**Figure S5.**  $^1\text{H}$  NMR spectrum of HMDA recovered from PA 66.

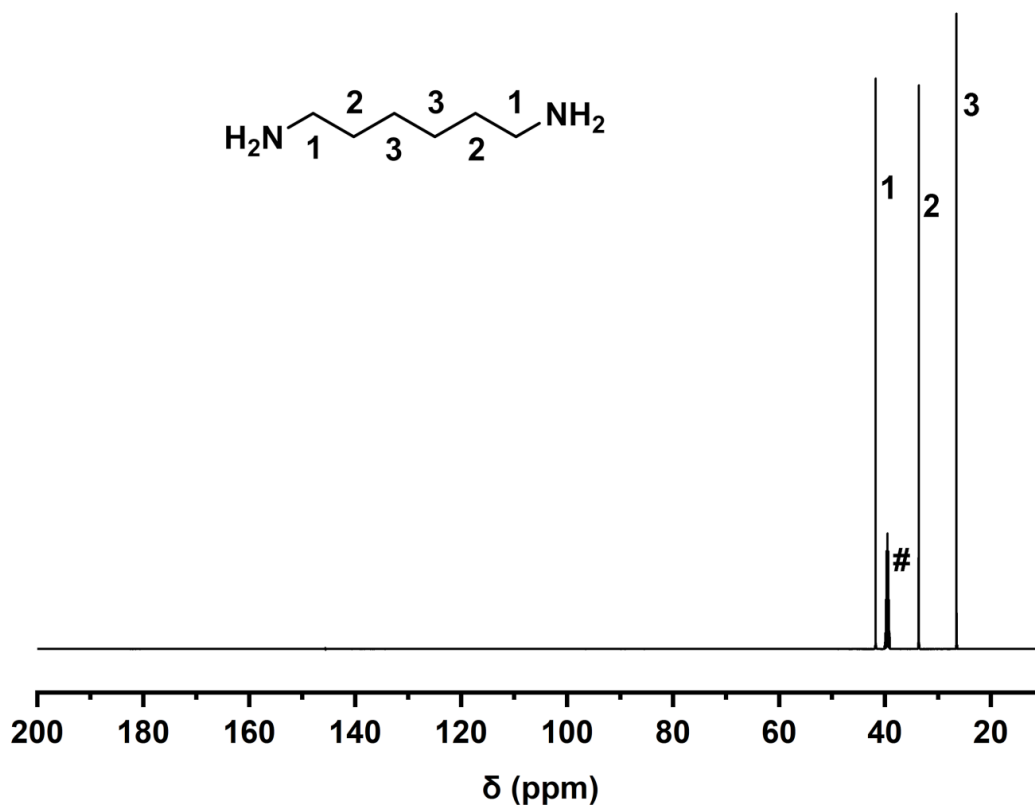

**Figure S6.**  $^{13}\text{C}$  NMR spectrum of HMDA recovered from PA 66.

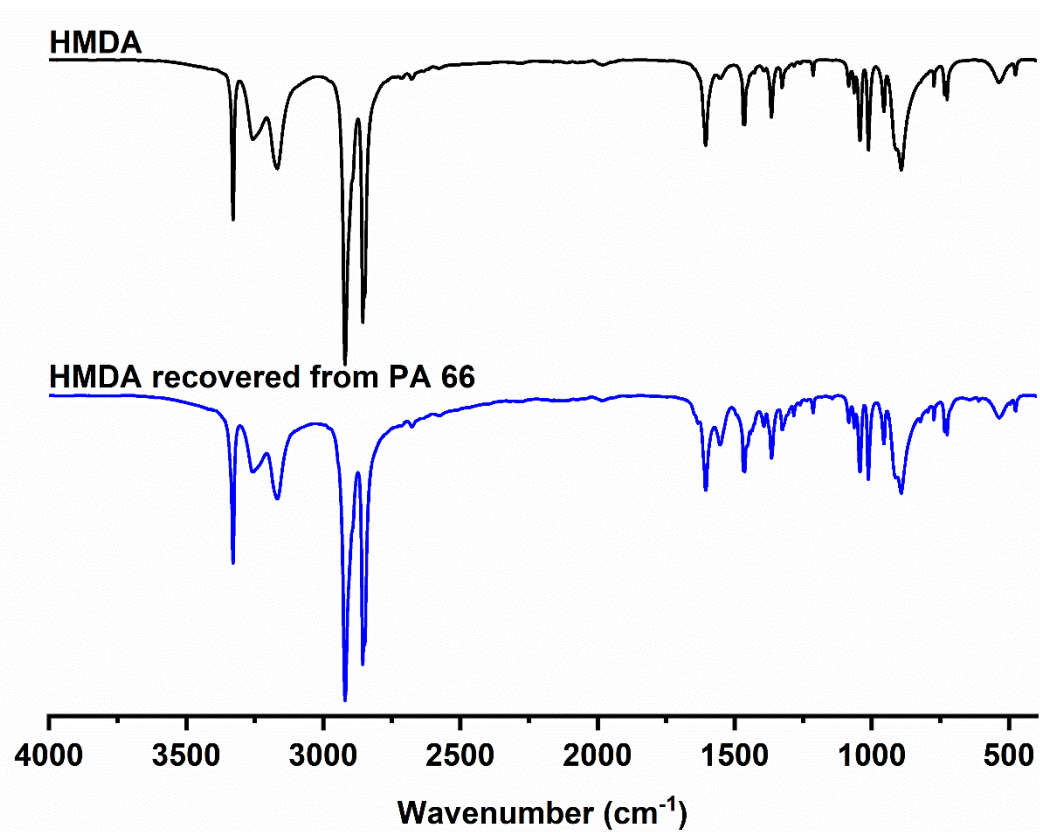

Figure S7. FTIR spectra of commercial HMDA and that recovered from PA 66.

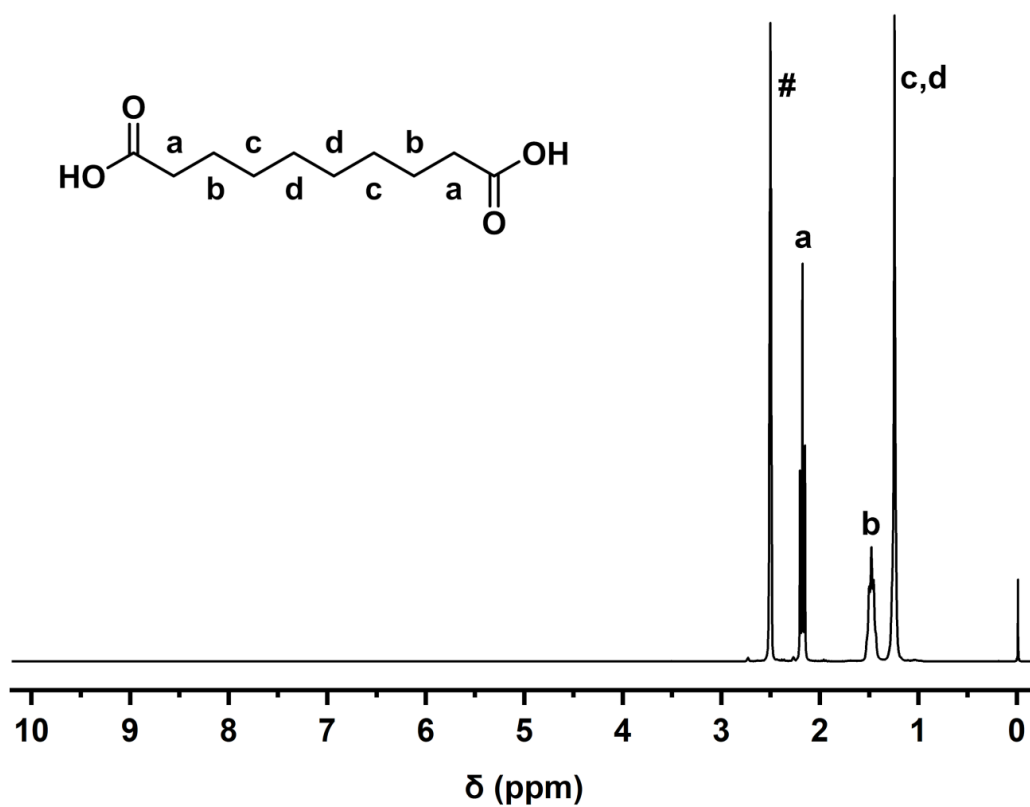

Figure S8. <sup>1</sup>H NMR spectrum of SA recovered from PA 1010.

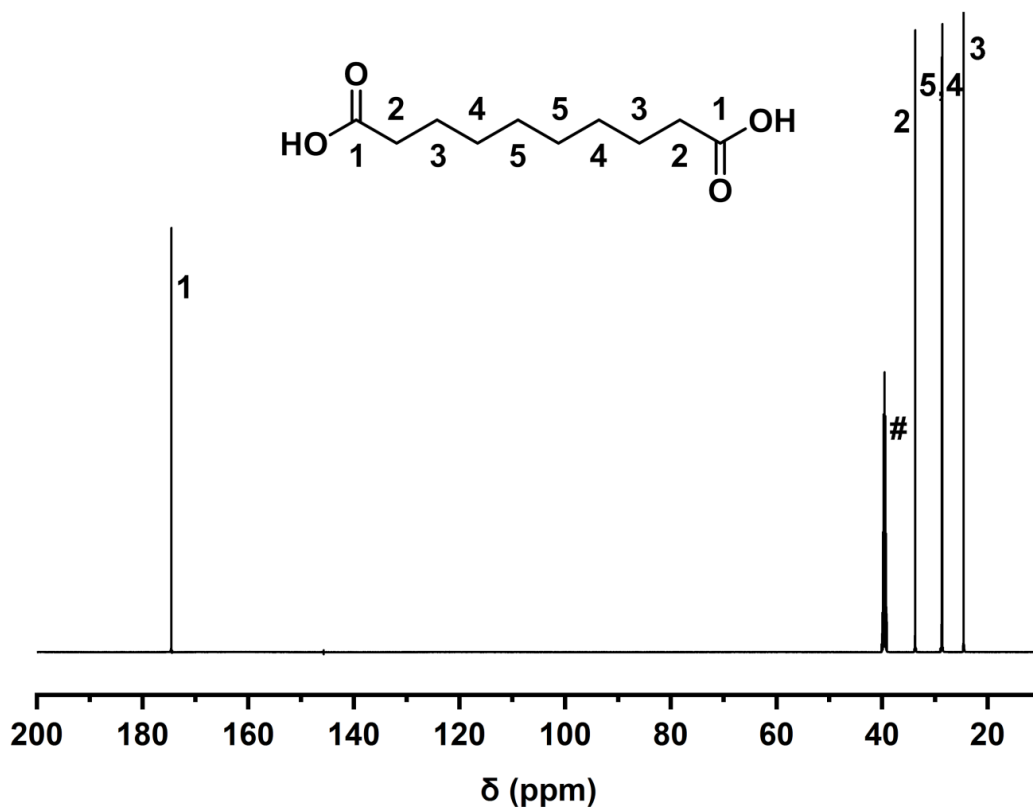

Figure S9.  $^{13}\text{C}$  NMR spectrum of SA recovered from PA 1010.

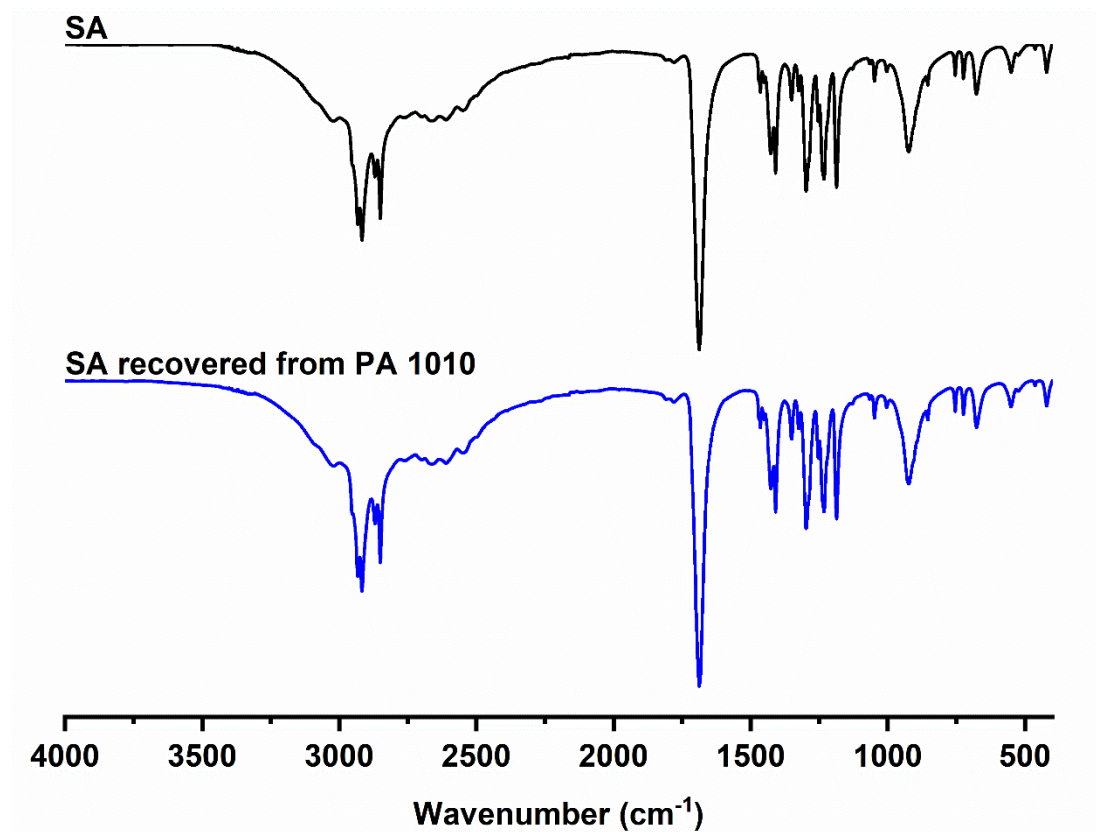

Figure S10. FTIR spectra of commercial SA and that recovered from PA 1010.

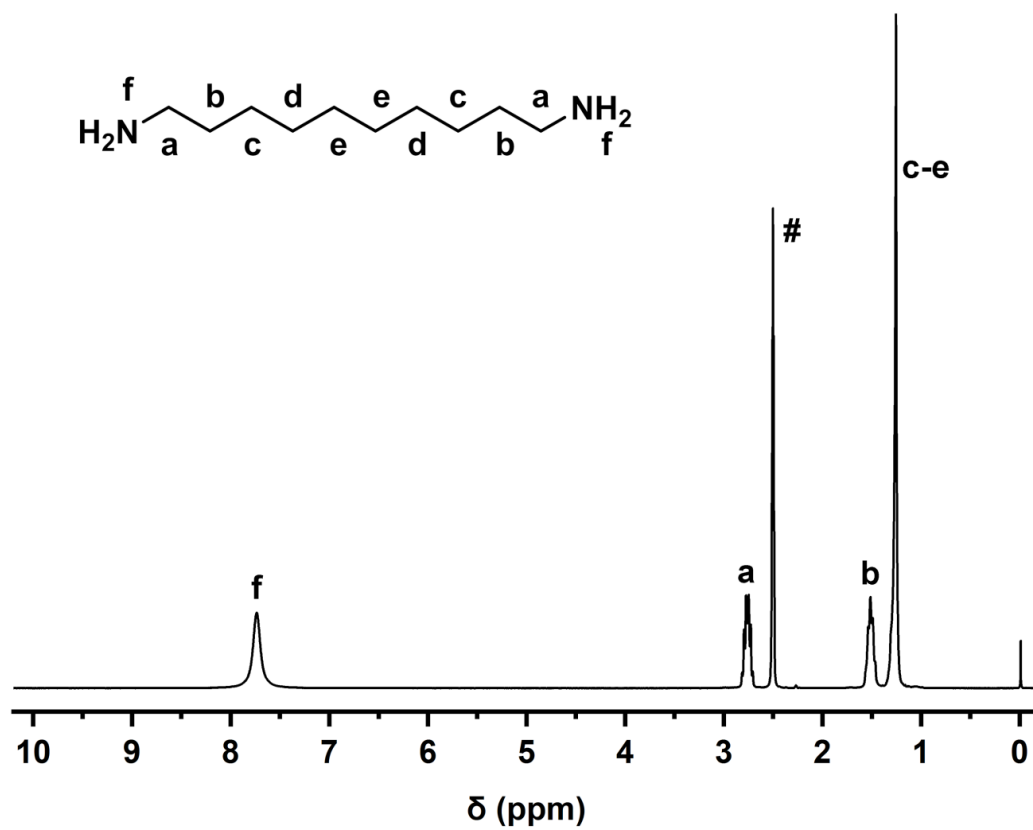

**Figure S11.** <sup>1</sup>H NMR spectrum of 1,10-DDA recovered from PA 1010.

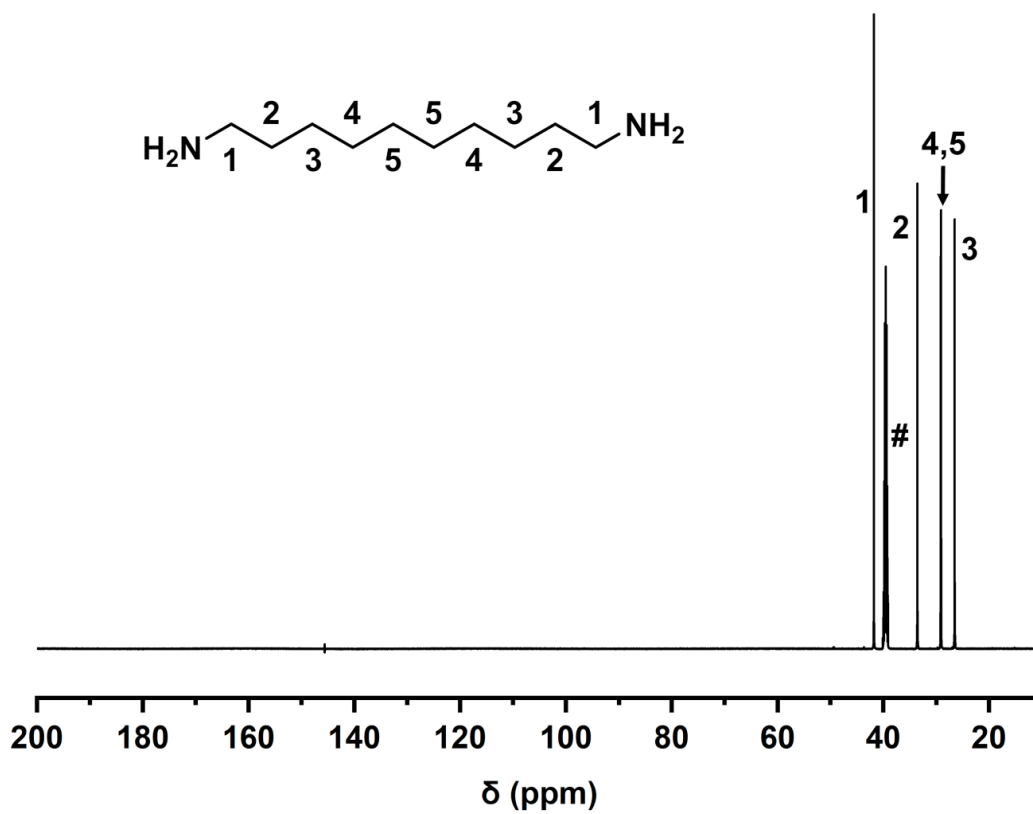

**Figure S12.** <sup>13</sup>C NMR spectrum of 1,10-DDA recovered from PA 1010.



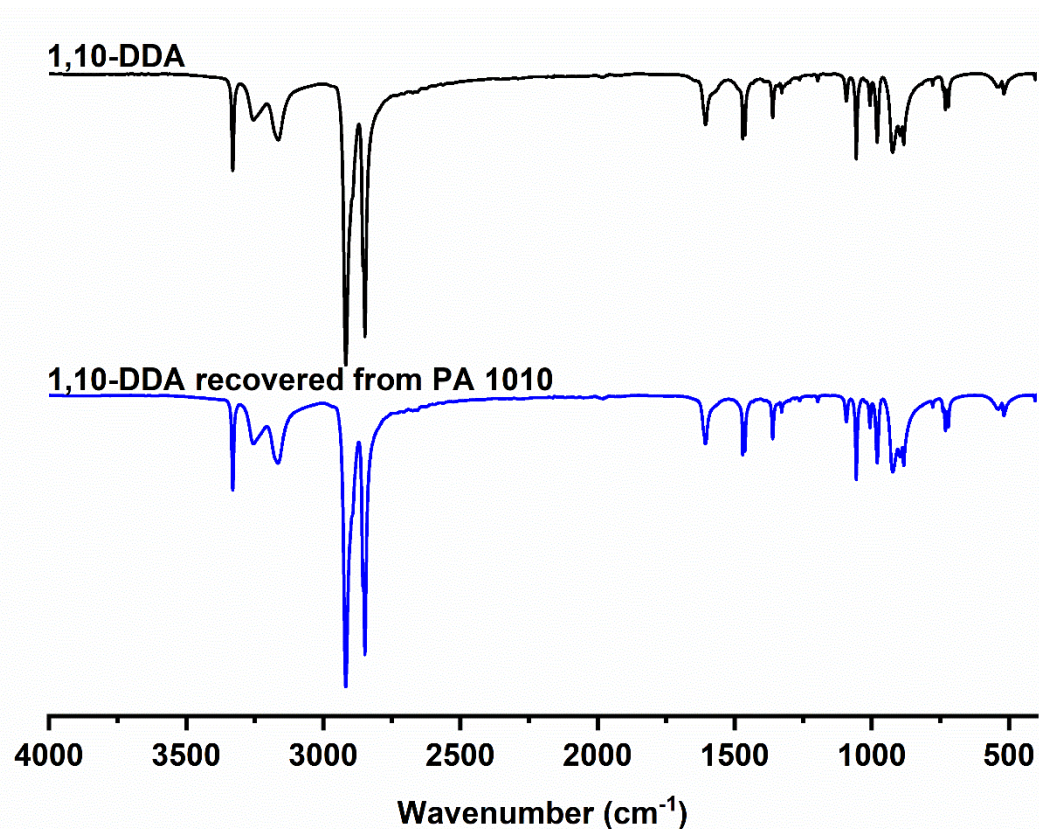

**Figure S13.** FTIR spectra of commercial 1,10-DDA and that recovered from PA 1010.

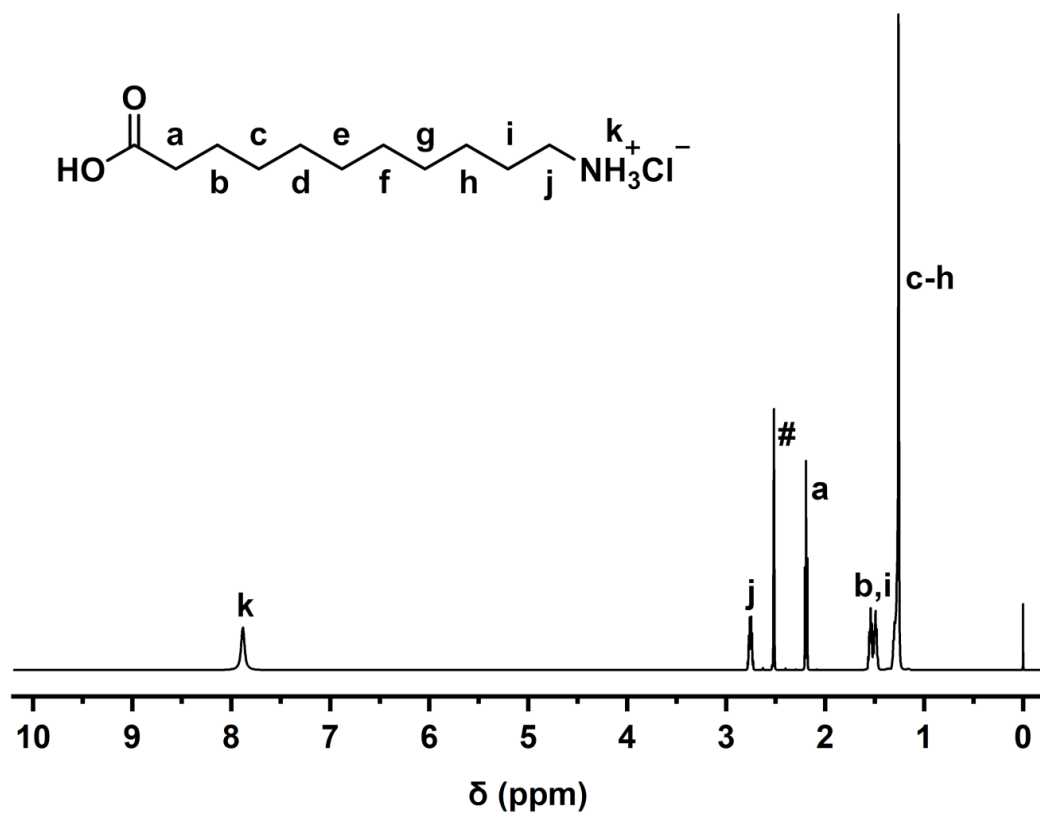

**Figure S14.**  $^1\text{H}$  NMR spectrum of 11-AUDAxHCl recovered from PA 11.

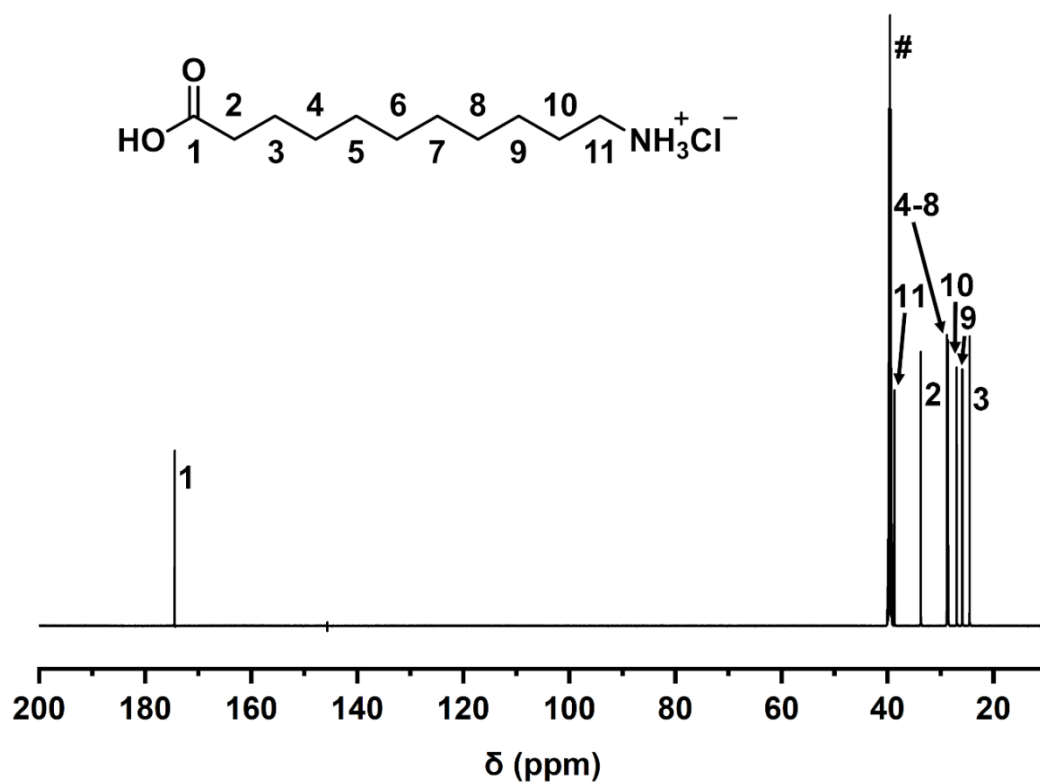

**Figure S15.**  $^{13}\text{C}$  NMR spectrum of 11-AUDAxHCl recovered from PA 11.

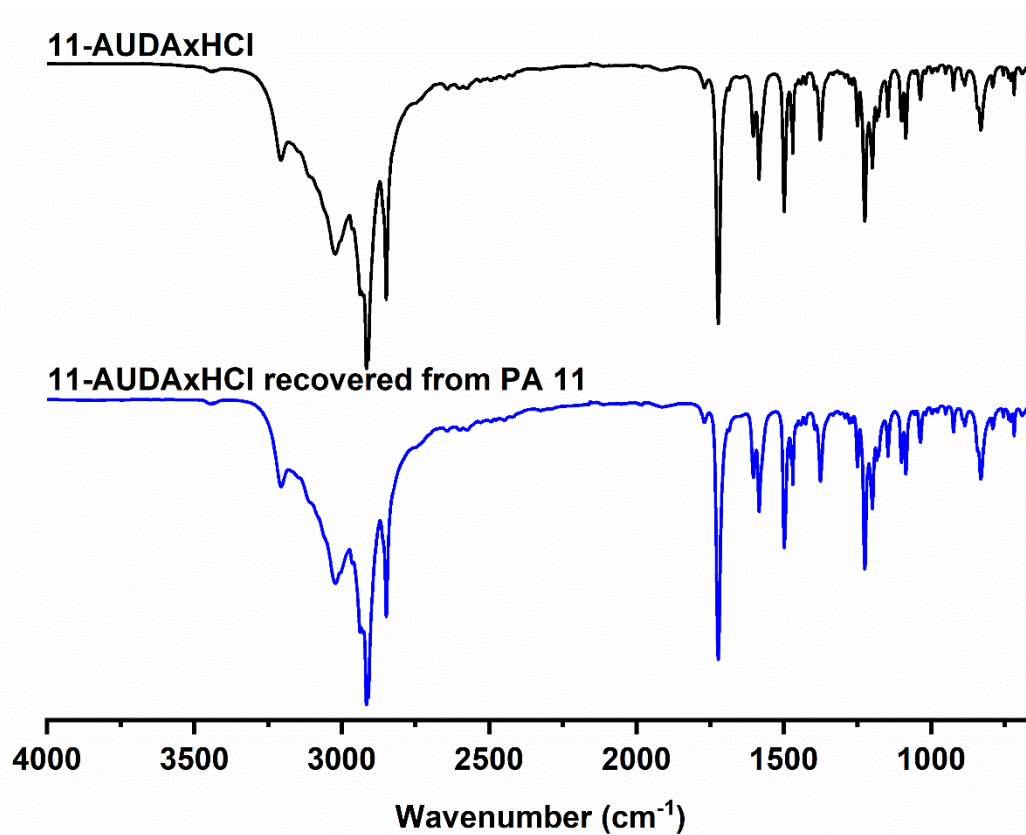

**Figure S16.** FTIR spectra of 11-AUDAxHCl prepared from commercial 11-AUDA and that recovered from PA 11.

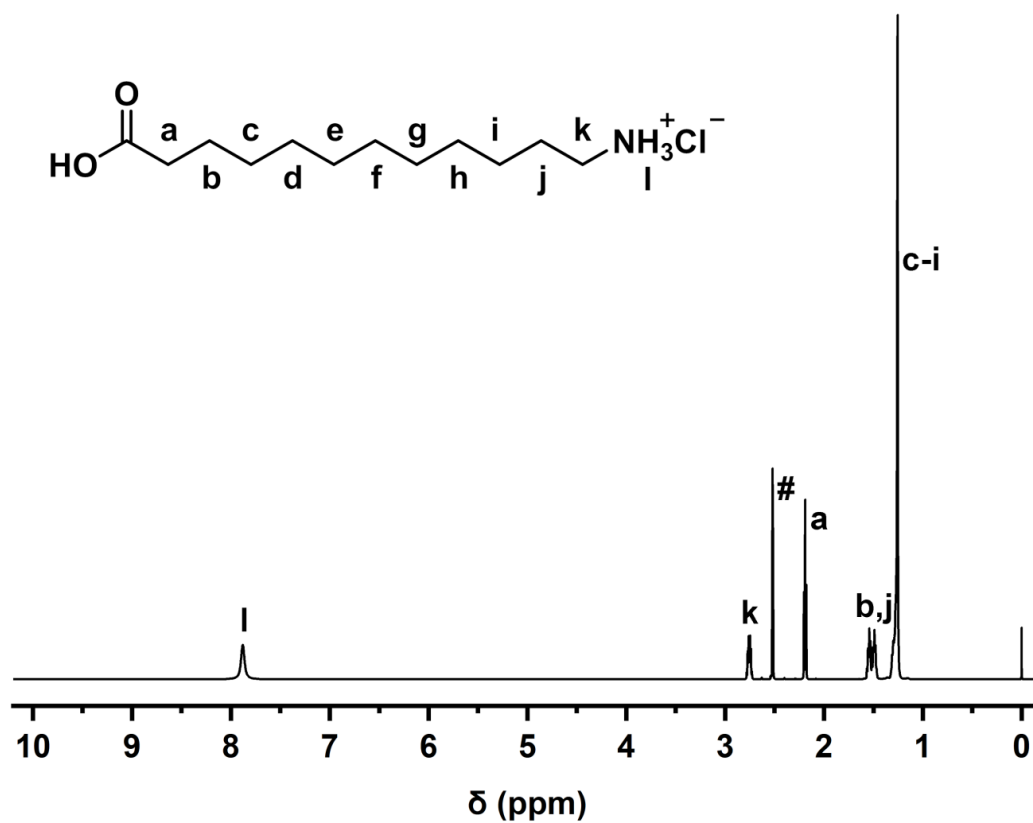

Figure S17.  $^1\text{H}$  NMR spectrum of 12-ADDAXHCl recovered from PA 12.

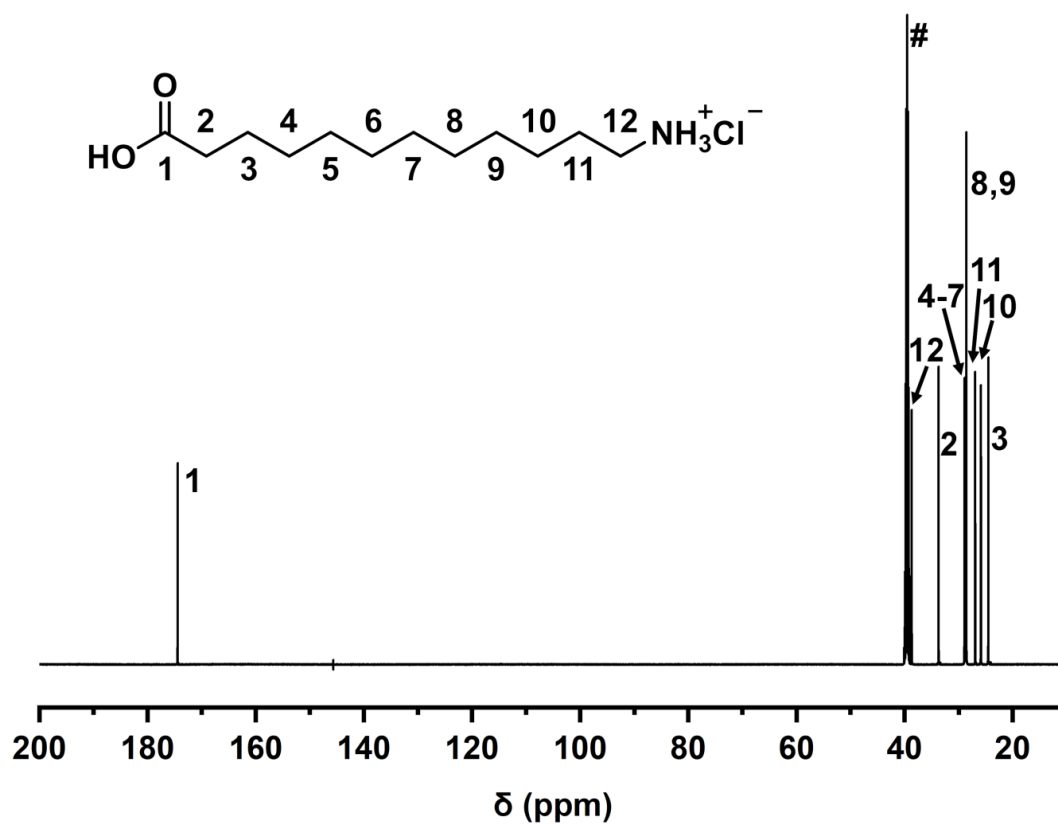

Figure S18.  $^{13}\text{C}$  NMR spectrum of 12-ADDAXHCl recovered from PA 12.

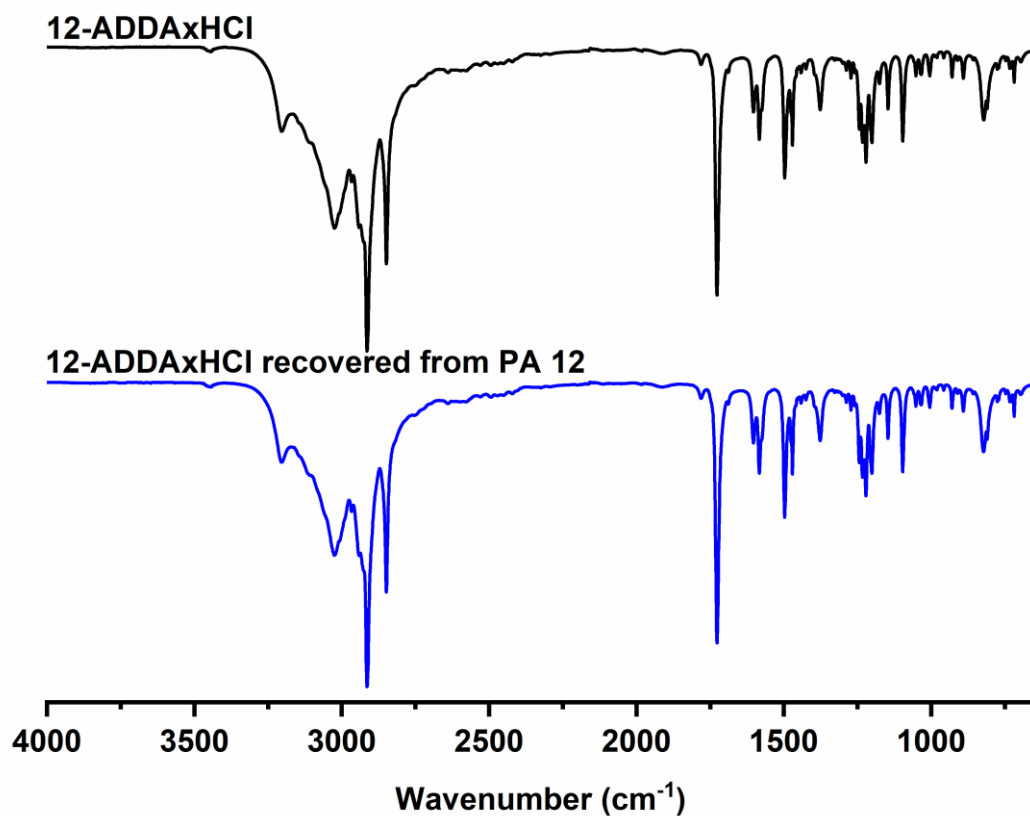

**Figure S19.** FTIR spectra of 12-ADDaxHCl prepared from commercial 12-ADDA and that recovered from PA 12.

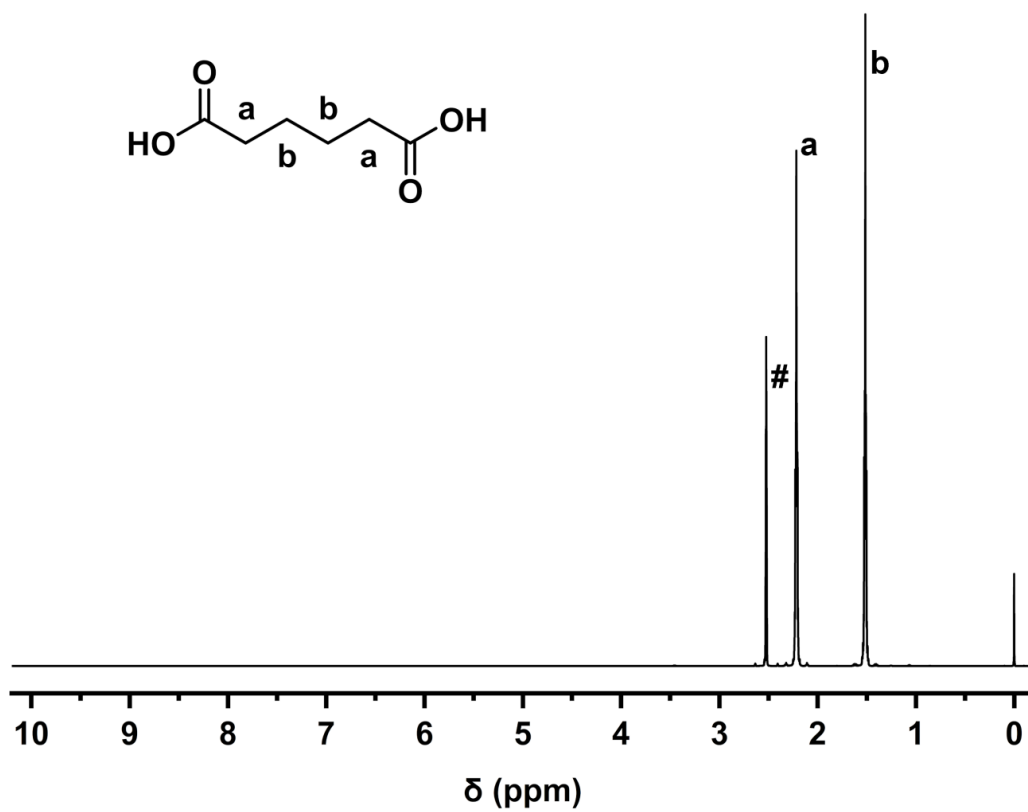

**Figure S20.** <sup>1</sup>H NMR spectrum of AA recovered from PA 66-GF<sub>35</sub>.

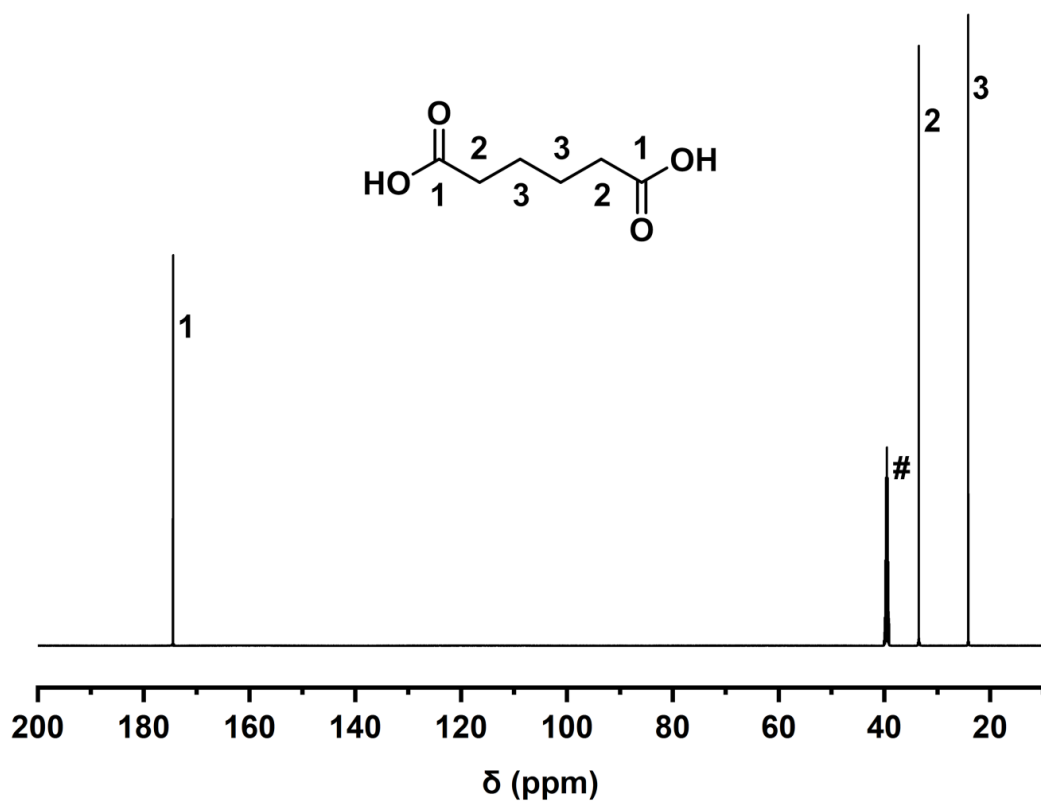

**Figure S21.**  $^{13}\text{C}$  NMR spectrum of AA recovered from PA 66-GF<sub>35</sub>.

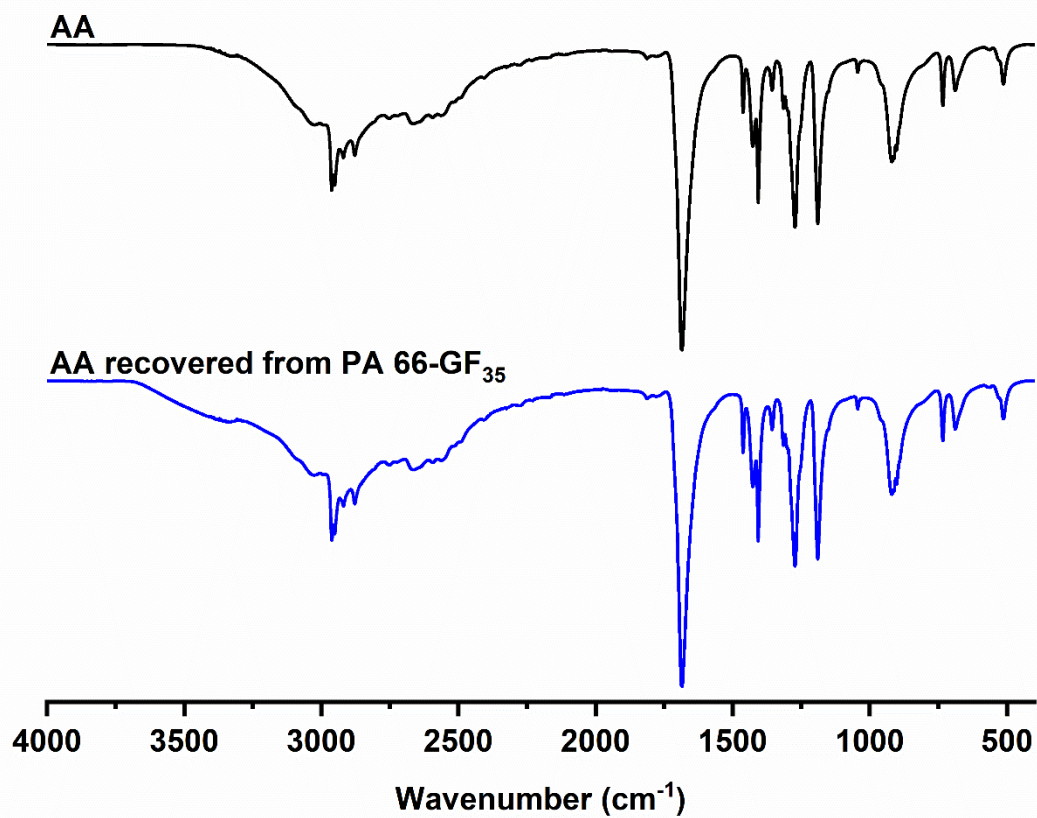

**Figure S22.** FTIR spectra of commercial AA and that recovered from PA 66-GF<sub>35</sub>.

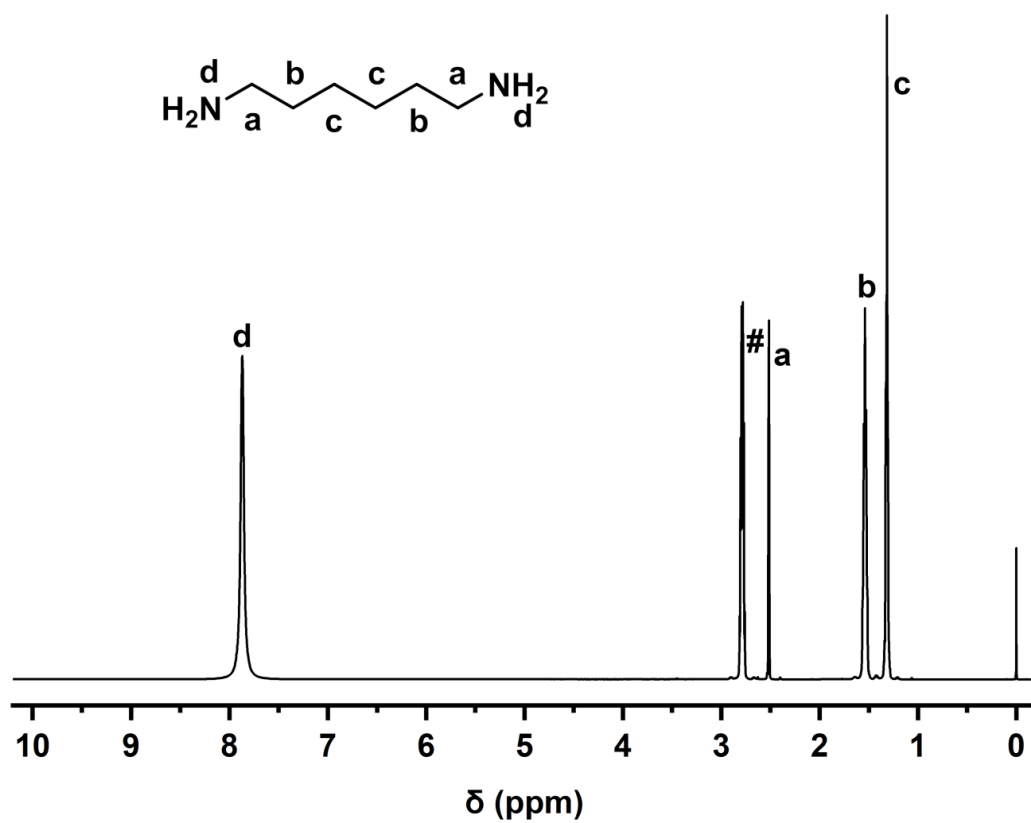

**Figure S23.**  $^1\text{H}$  NMR spectrum of HMDA recovered from PA 66-GF<sub>35</sub>.

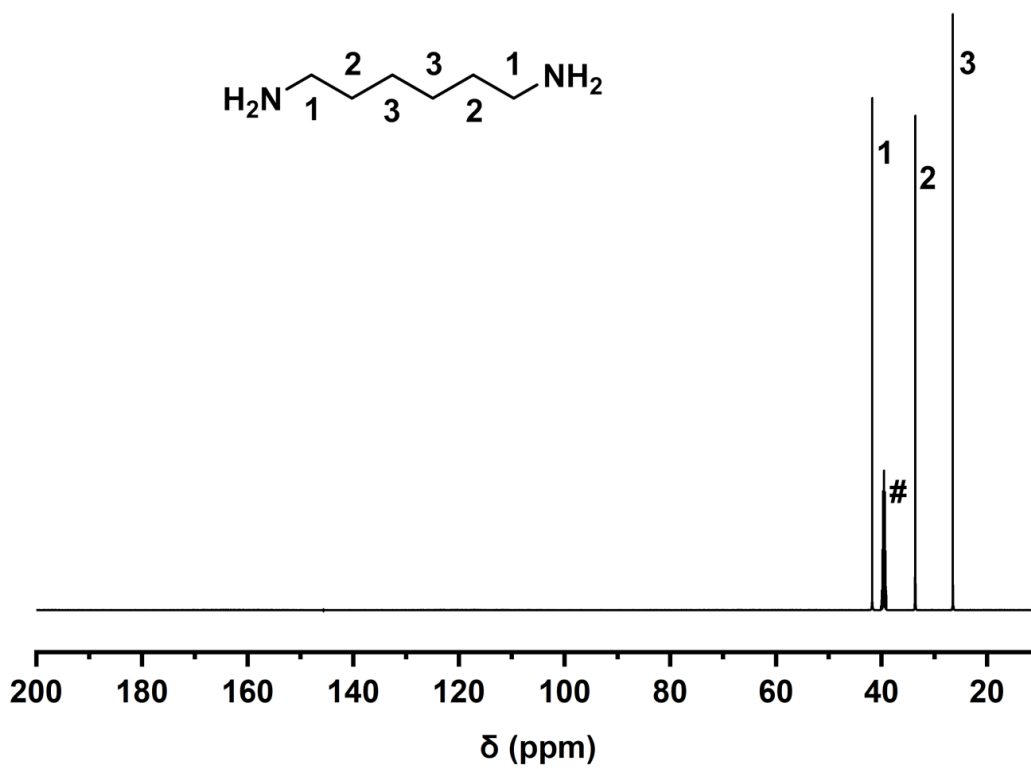

**Figure S24.**  $^{13}\text{C}$  NMR spectrum of HMDA recovered from PA 66-GF<sub>35</sub>.

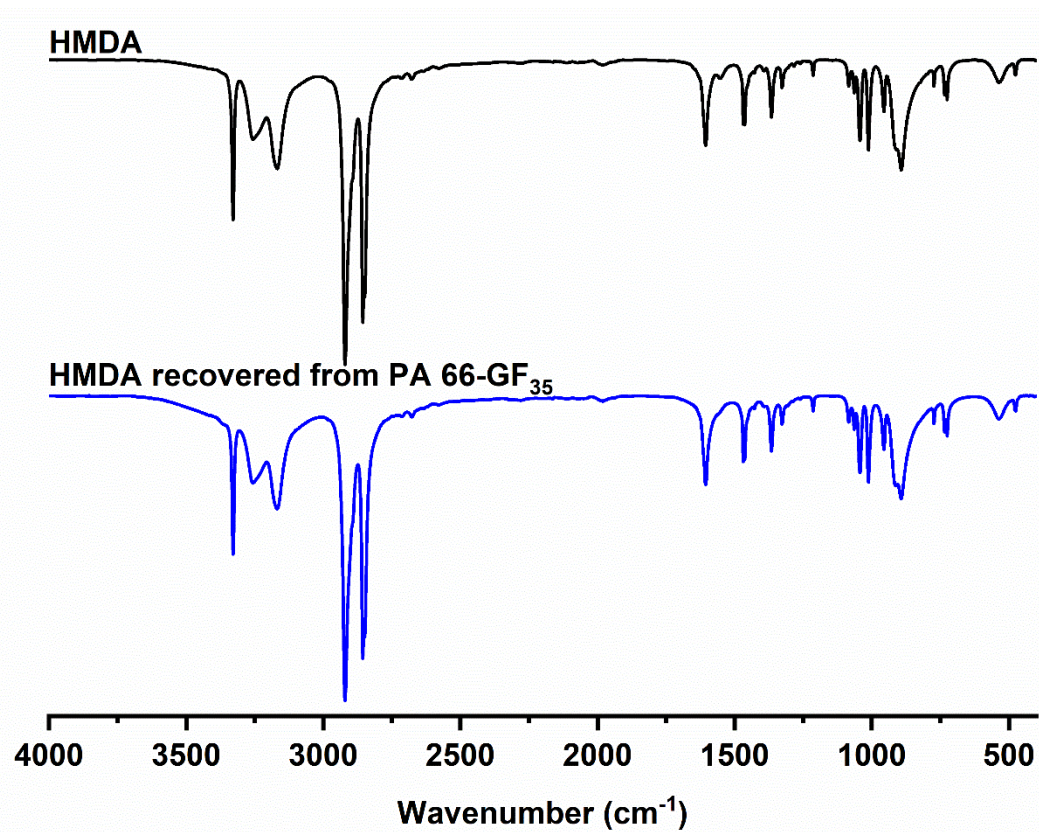

Figure S25. FTIR spectra of commercial HMDA and that recovered from PA 66-GF<sub>35</sub>.

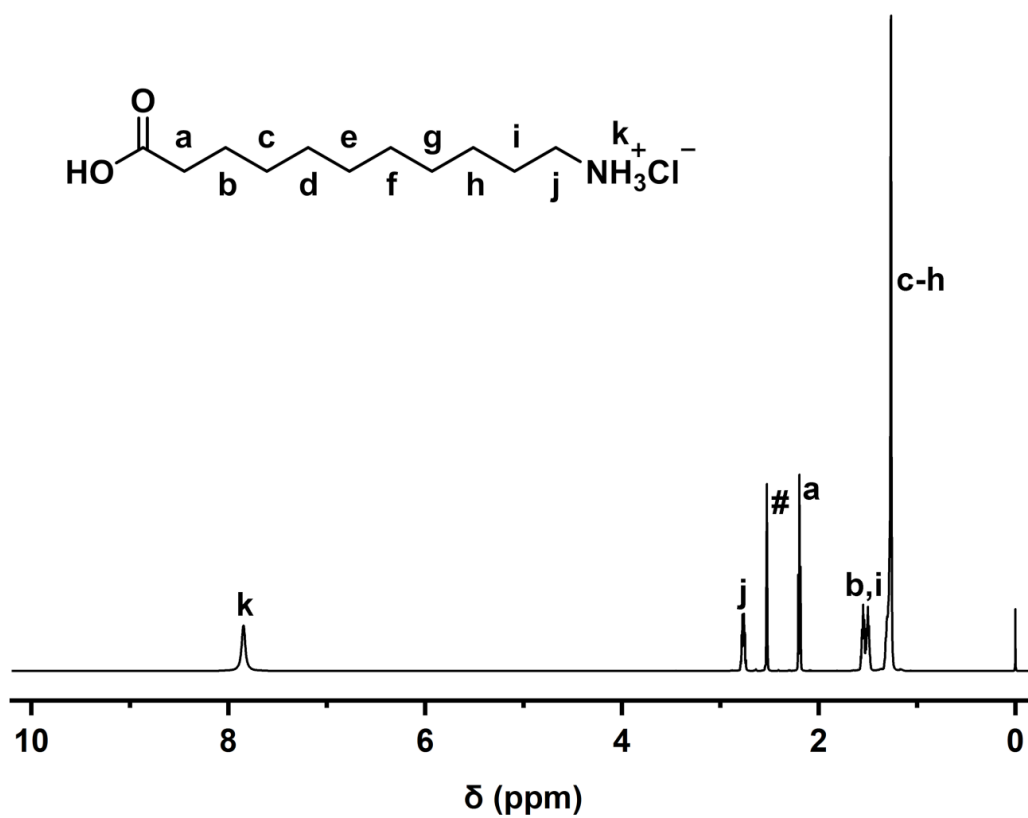

Figure S26. <sup>1</sup>H NMR spectrum of 11-AUDAxHCl recovered from PA 11-GF<sub>30</sub>.

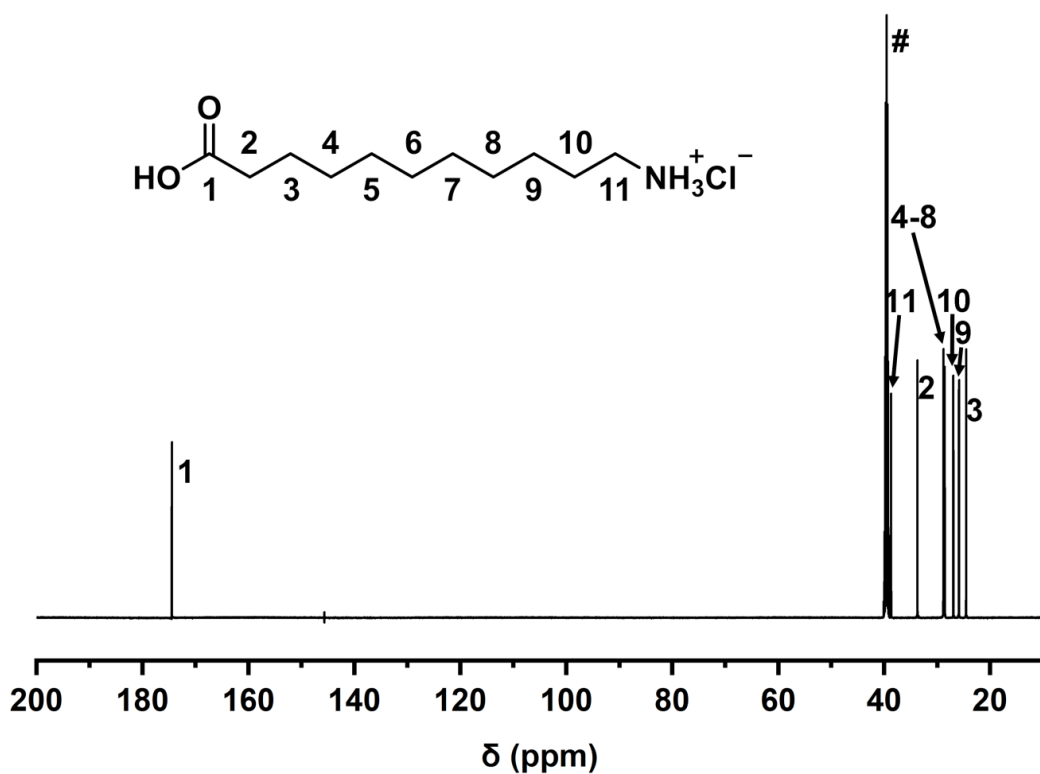

**Figure S27.** <sup>13</sup>C NMR spectrum of 11-AUDAxHCl recovered from PA 11-GF<sub>30</sub>.

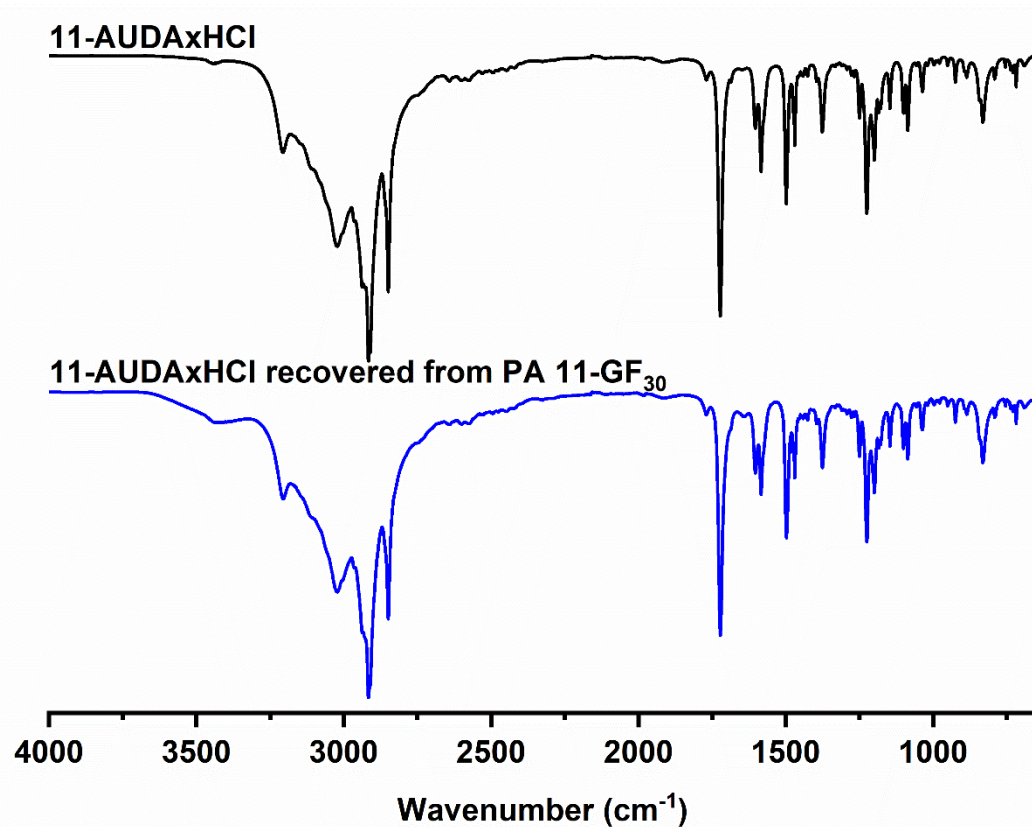

**Figure S28.** FTIR spectra of 11-AUDAxHCl prepared from commercial 11-AUDA and that recovered from PA 11-GF<sub>30</sub>.



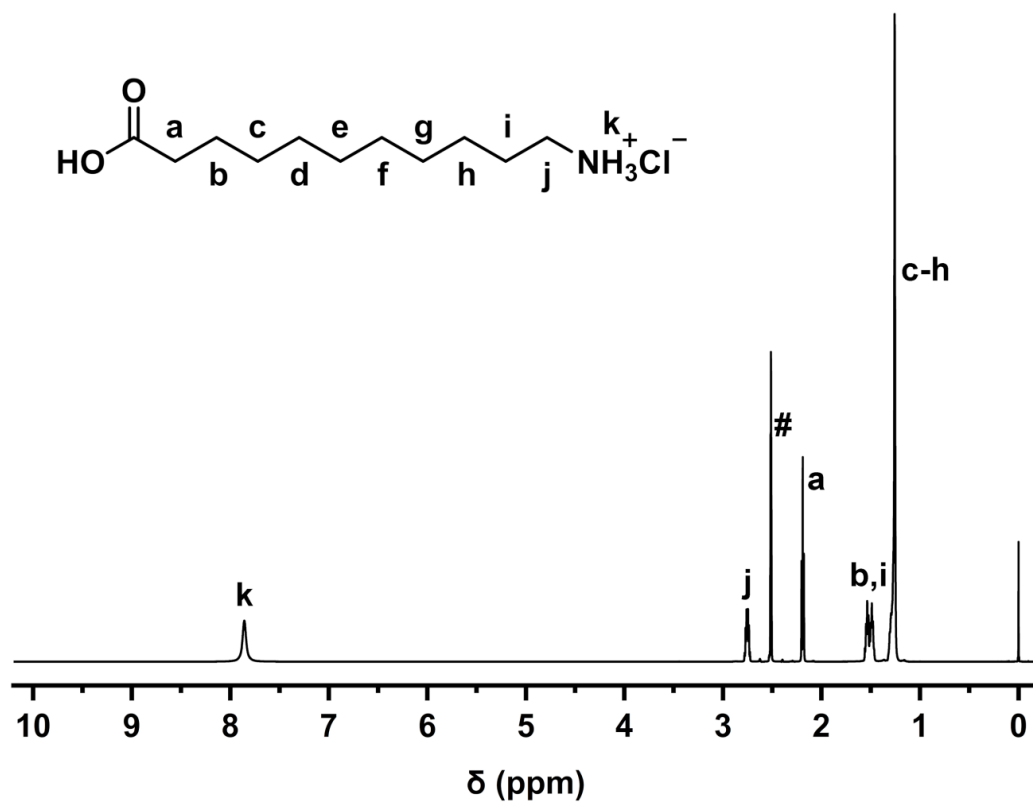

Figure S29.  $^1\text{H}$  NMR spectrum of 11-AUDAxHCl recovered from PA 11-CF<sub>30</sub>.

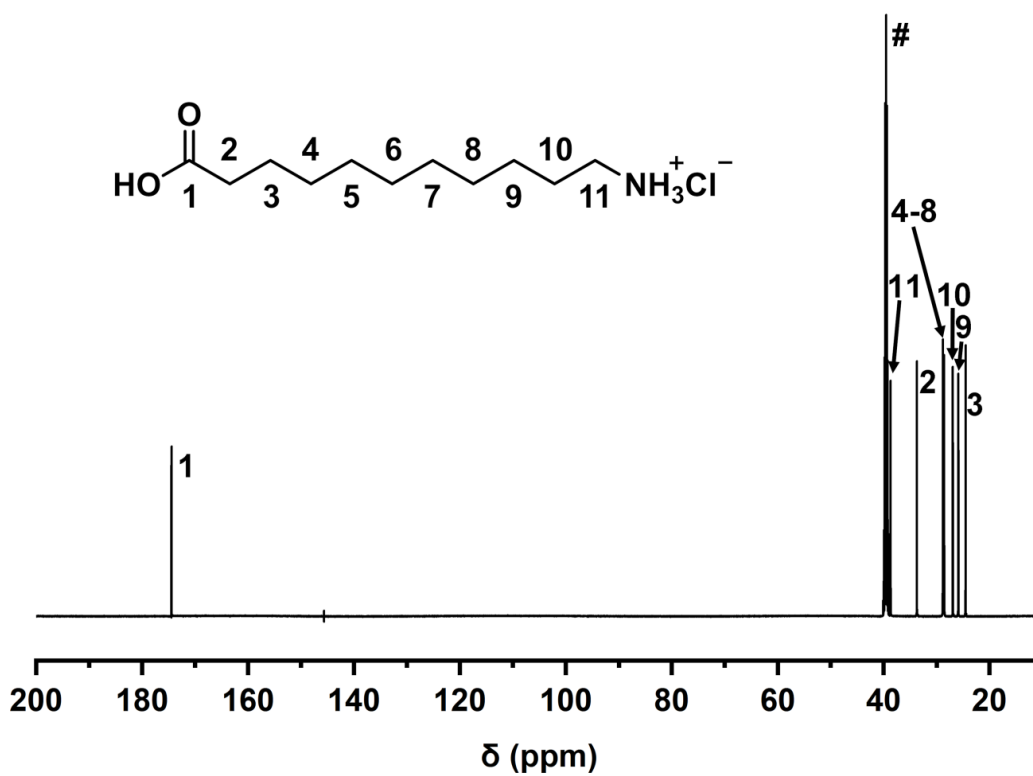

Figure S30.  $^{13}\text{C}$  NMR spectrum of 11-AUDAxHCl recovered from PA 11-CF<sub>30</sub>.

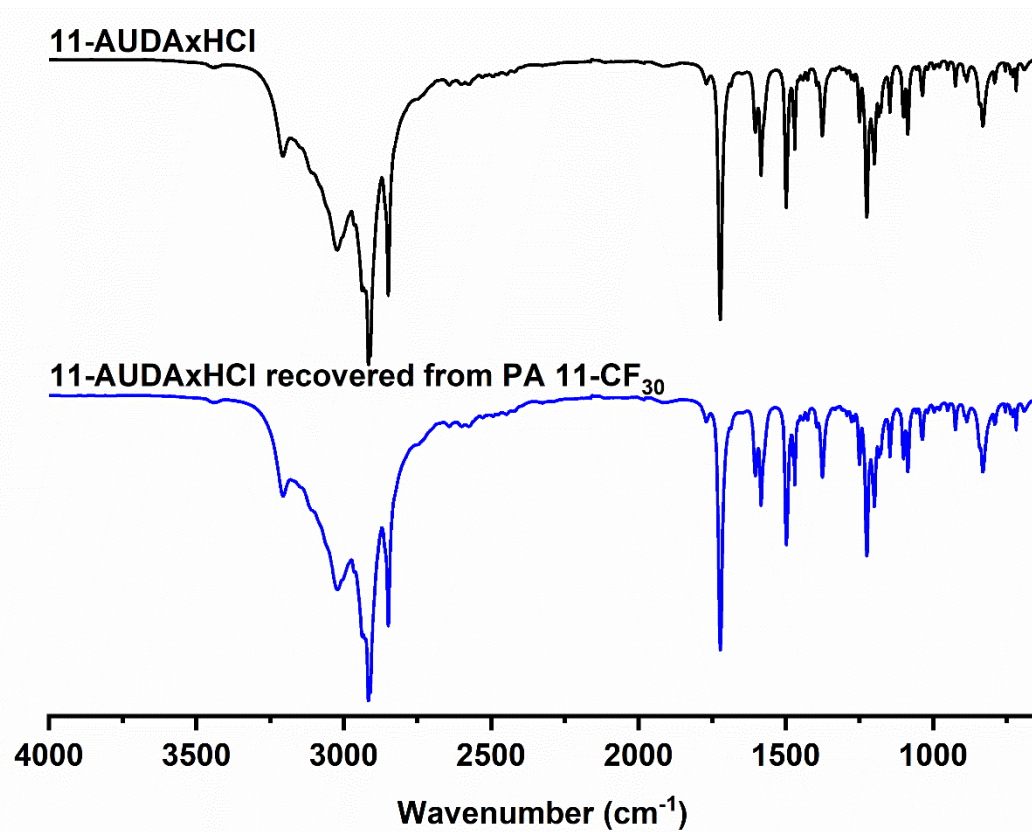

**Figure S31.** FTIR spectra of 11-AUDAxHCl prepared from commercial 11-AUDA and that recovered from PA 11-CF<sub>30</sub>.

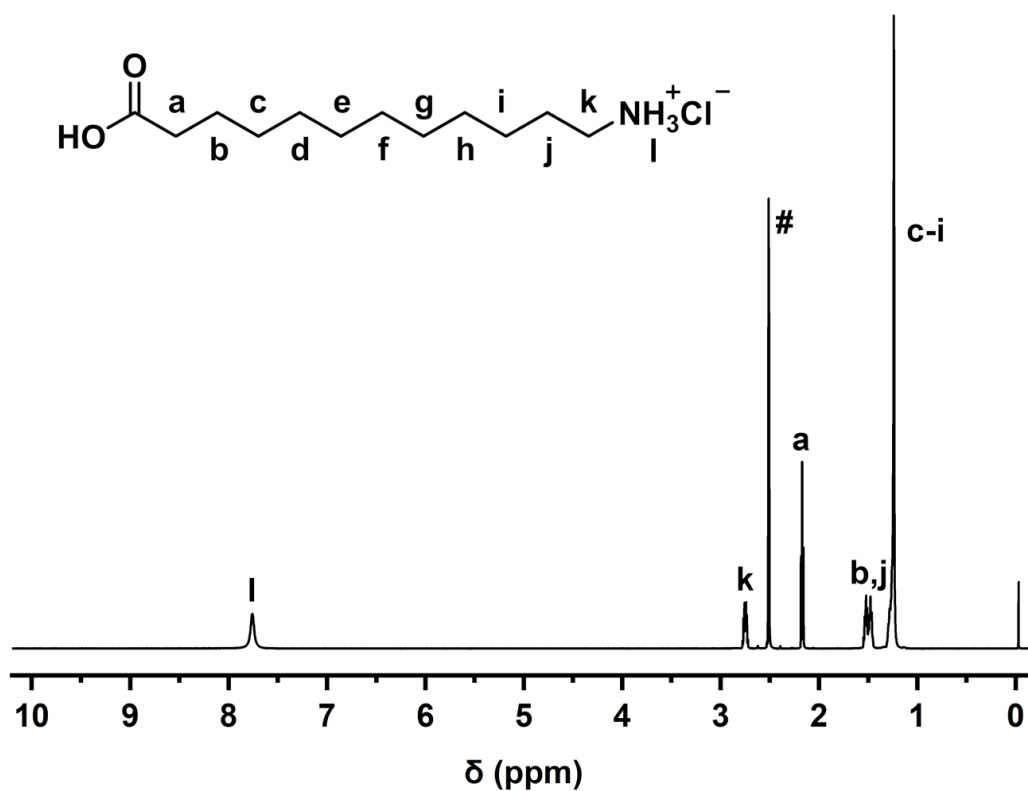

**Figure S32.** <sup>1</sup>H NMR spectrum of 12-ADDAxHCl recovered from PA 12-GF<sub>50</sub>.

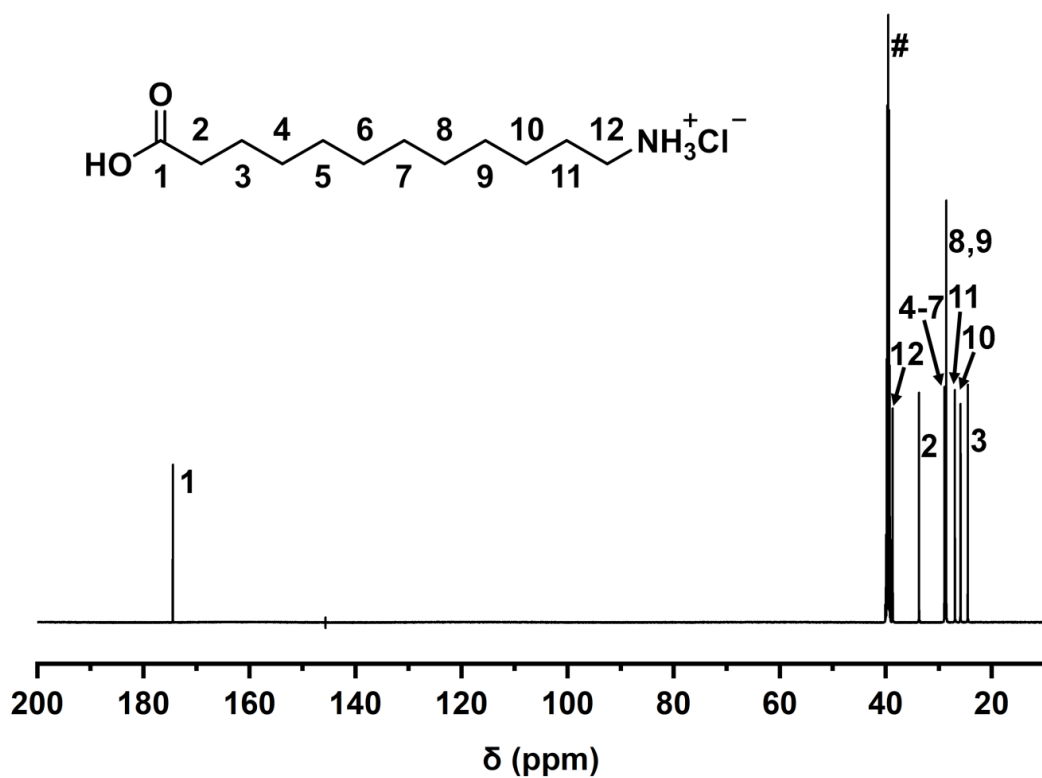

**Figure S33.**  $^{13}\text{C}$  NMR spectrum of 12-ADDaxHCl recovered from PA 12-GF<sub>50</sub>.

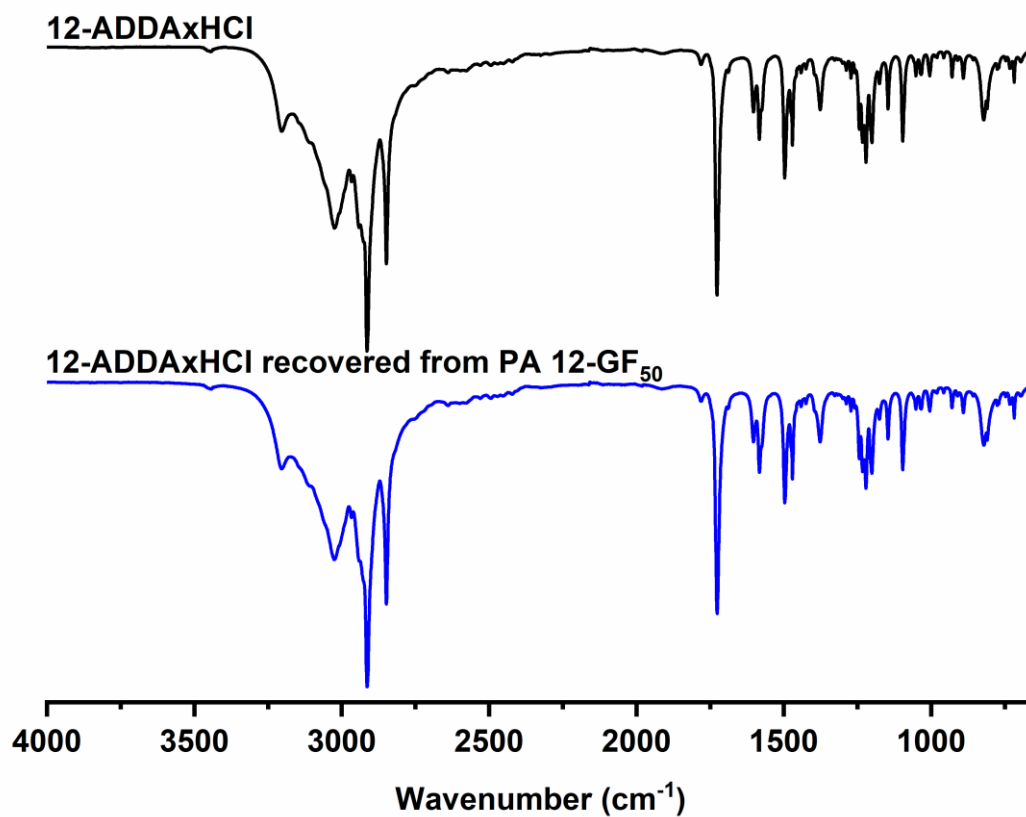

**Figure S34.** FTIR spectra of 12-ADDaxHCl prepared from commercial 12-ADDA and that recovered from PA 12-GF<sub>50</sub>.

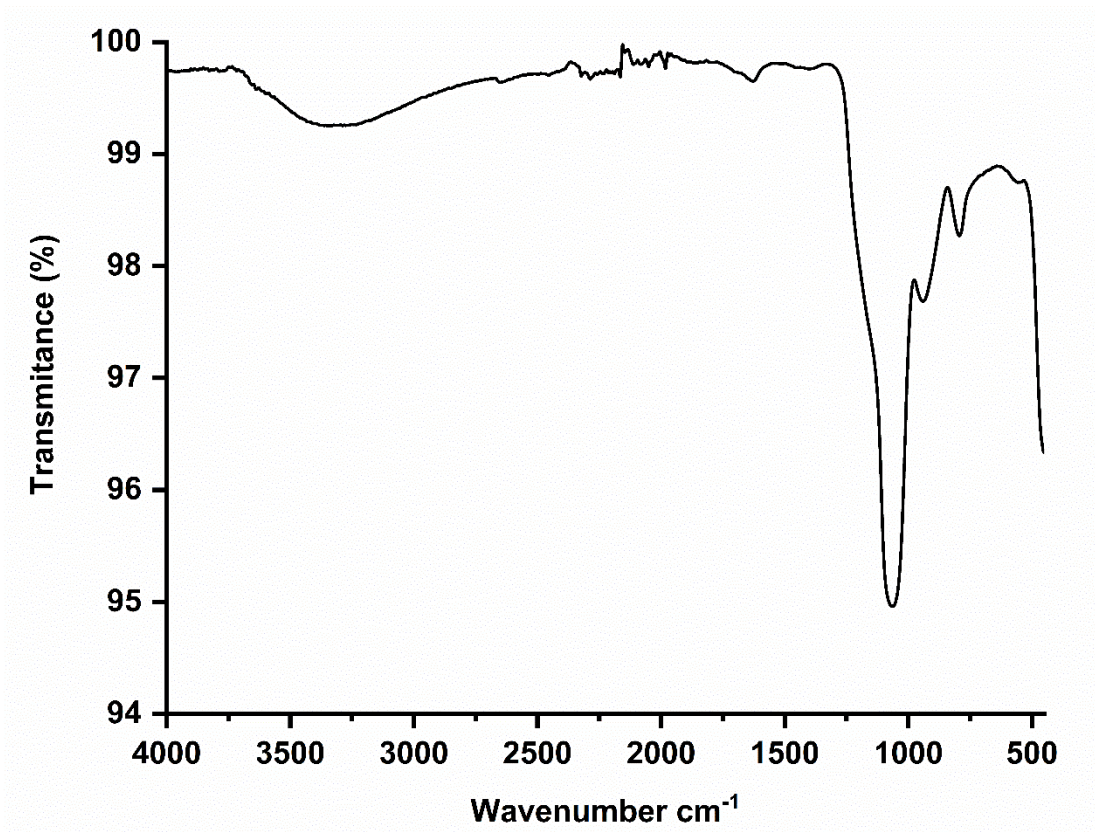

Figure S35. FTIR spectrum of GF recovered from PA 11-GF30.

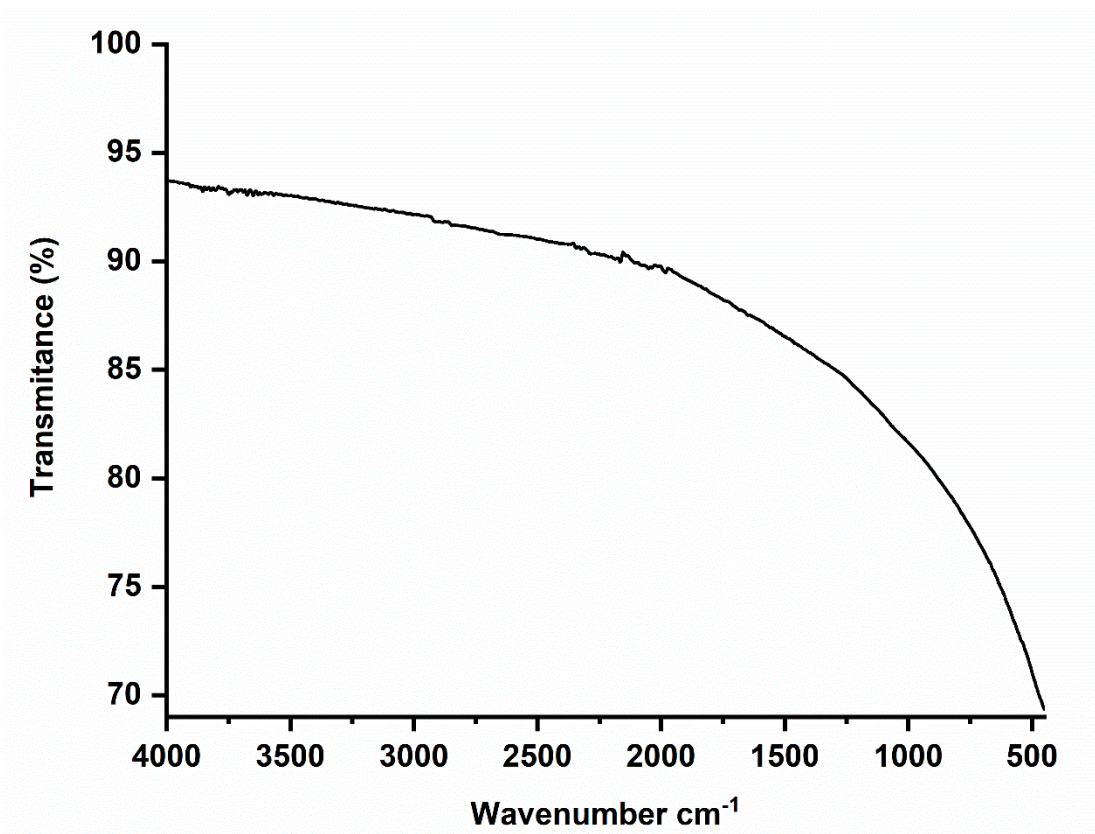

Figure S36. FTIR spectrum of CF recovered from PA 11-CF<sub>30</sub>.
